# Supplementary material for: Evaluation of Arterial Spin Labeling MRI—Comparison with 15O-Water PET on an Integrated PET/MR Scanner
Source: MDPI journal article supplement (doi:10.3390/diagnostics11050821), 2021-05-01
Supplement: s1 [file s1]

**Table S1:** Acquisition parameter of MRI scans

| Name     | Sequence type            | Orientation | TR/TE/TI/FA      | Matrix (mm)     | Slices | Other                                              |
|----------|--------------------------|-------------|------------------|-----------------|--------|----------------------------------------------------|
| T1W      | 3D-GRE                   | SAG         | 8.6/3.2/450/12   | 1x0.488x0.488   | 178    | NA                                                 |
| T2-FLAIR | 3D-TSE                   | SAG         | 7500/121/2147/90 | 0.6x0.488x0.488 | 296    | NA                                                 |
| ASL      | 3D Pseudo-Continuous FSE | TRA         | 4852/10.7/NA/90  | 1.875x1.875x4   | 36     | PLD = 2025 LD = 1800<br>No flow crushing gradients |
| ZTE      | RUFIS                    | TRA         | 0.7/0/NA/0.8     | 2.4x2.4x2.4     | 110    | NA                                                 |

ASL = Arterial Spin Labeling; NA = Not applicable; TR = Repetition Time (ms); TE = Echo Time (ms); TI = Inversion Time (ms);

FA = excitation Flip Angle (degrees); TRA = Transversal; SAG = Sagittal; PLD = Post Label Delay (ms); LD = Label Duration (ms);

FSE = Fast Spin Echo; RUFIS = Rotating UltraFast Imaging Sequence

**Figure S1.** Representative example of VOI definition for a healthy subject

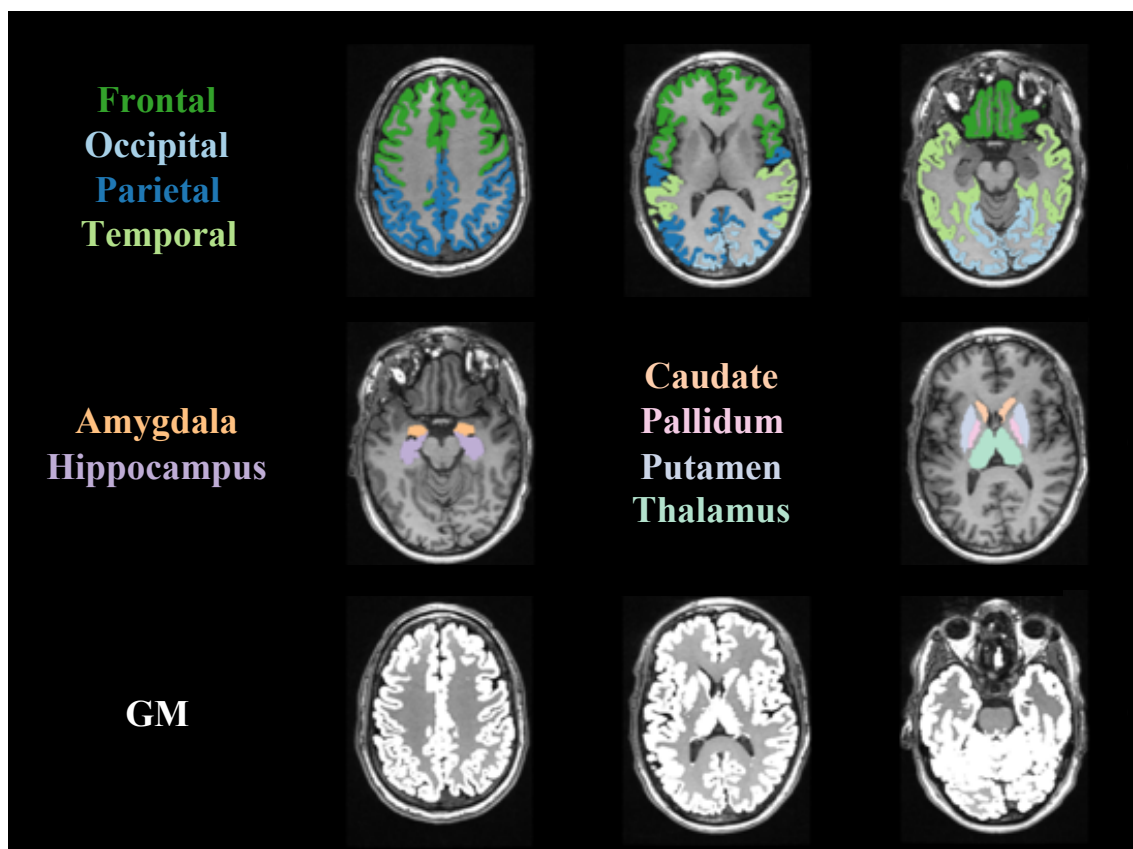

**Document S1.** Calculation of Regression-based Limits of Agreement (RLoA) – example grey matter

Regression equation of the differences in  $CBF_{ASL}$  and  $CBF_{PET}$  (D) on the average of  $CBF_{PET}$  and  $CBF_{ASL}$  (A) was

$$D = -0.80A + 39 \ (P < 0.001)$$

The regression equation of the absolute values of the regression residuals ( $R_{ABS}$ ) on A was

$$R_{ABS} = -0.08A + 13 \ (P = 0.3641)$$

If regression of  $R_{ABS}$  on A is not significant the standard deviation of  $R_{ABS}$  can be estimated as

$$SD_R = \sqrt{\pi/2} \times \bar{R}_{ABS} = \sqrt{\pi/2} \times 7.2 = 9.04$$

Regression-based upper and lower limits of agreement is then

$$D \pm 1.96 \times SD_R$$

Which is equal to

$$RLoA_L = -0.80A + 39 - (1.96 \times 9.04)$$

$$RLoA_U = -0.80A + 39 + (1.96 \times 9.04)$$

These linear equations are plotted on the Bland-Altman plots.
